# Supplementary material
Source: PubMed Central journal article supplement (PMC7771569)
Supplement: NIHMS1652650-supplement-Supplemental_Material.pdf [file NIHMS1652650-supplement-Supplemental_Material.pdf]

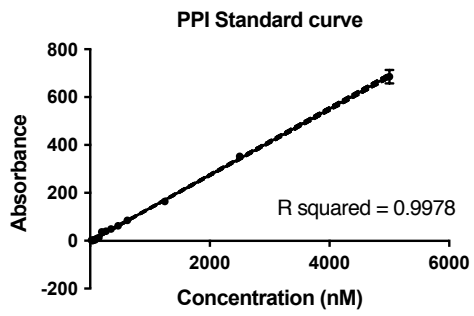

Supplemental Figure 1: PPI standard curve. PPI standard curve concentrations (26.4 – 5,000nM) were measured in triplicate by adding the indicated amount of sodium pyrophosphate decahydrate (Acros Organics, catalog number 13472-36-1) to the reaction buffer described in the material and methods section to interpolate a standard curve. R squared value = 0.9978.
